# Supplementary material for: Regional trends, spatial patterns and determinants of health facility delivery among women of reproductive age in Nigeria: A national population based cross-sectional study
Source: PubMed Central journal article supplement (PMC11482673; doi:10.1371/journal.pone.0312005), 2024-10-16

# PLOS ONE

## Regional Trends, Spatial Patterns and Determinants of Health Facility Delivery Among Women of Reproductive Age in Nigeria: A National Population Based Cross-Sectional Study

--Manuscript Draft--

|                                |                                                                                                                                                                                                                                                                                                                                                                                                                                                                                                                                                                                                                                                                                                                                                                                                                                                                                                                                                                                                                                                                                                                                                                                                                                                                                                                                                                                                                                                                                                                                                                                                                                                                                                                                                                                                                                                                                                                                                                                                                                                                                      |
|--------------------------------|--------------------------------------------------------------------------------------------------------------------------------------------------------------------------------------------------------------------------------------------------------------------------------------------------------------------------------------------------------------------------------------------------------------------------------------------------------------------------------------------------------------------------------------------------------------------------------------------------------------------------------------------------------------------------------------------------------------------------------------------------------------------------------------------------------------------------------------------------------------------------------------------------------------------------------------------------------------------------------------------------------------------------------------------------------------------------------------------------------------------------------------------------------------------------------------------------------------------------------------------------------------------------------------------------------------------------------------------------------------------------------------------------------------------------------------------------------------------------------------------------------------------------------------------------------------------------------------------------------------------------------------------------------------------------------------------------------------------------------------------------------------------------------------------------------------------------------------------------------------------------------------------------------------------------------------------------------------------------------------------------------------------------------------------------------------------------------------|
| <b>Manuscript Number:</b>      | PONE-D-23-37668                                                                                                                                                                                                                                                                                                                                                                                                                                                                                                                                                                                                                                                                                                                                                                                                                                                                                                                                                                                                                                                                                                                                                                                                                                                                                                                                                                                                                                                                                                                                                                                                                                                                                                                                                                                                                                                                                                                                                                                                                                                                      |
| <b>Article Type:</b>           | Research Article                                                                                                                                                                                                                                                                                                                                                                                                                                                                                                                                                                                                                                                                                                                                                                                                                                                                                                                                                                                                                                                                                                                                                                                                                                                                                                                                                                                                                                                                                                                                                                                                                                                                                                                                                                                                                                                                                                                                                                                                                                                                     |
| <b>Full Title:</b>             | Regional Trends, Spatial Patterns and Determinants of Health Facility Delivery Among Women of Reproductive Age in Nigeria: A National Population Based Cross-Sectional Study                                                                                                                                                                                                                                                                                                                                                                                                                                                                                                                                                                                                                                                                                                                                                                                                                                                                                                                                                                                                                                                                                                                                                                                                                                                                                                                                                                                                                                                                                                                                                                                                                                                                                                                                                                                                                                                                                                         |
| <b>Short Title:</b>            | Regional Trends, Spatial Patterns and Determinants of Health Facility Delivery Among Women in Nigeria                                                                                                                                                                                                                                                                                                                                                                                                                                                                                                                                                                                                                                                                                                                                                                                                                                                                                                                                                                                                                                                                                                                                                                                                                                                                                                                                                                                                                                                                                                                                                                                                                                                                                                                                                                                                                                                                                                                                                                                |
| <b>Corresponding Author:</b>   | Tope Olubodun, M.D, M.P.H.<br>Federal Medical Centre Abeokuta<br>Abeokuta, Ogun NIGERIA                                                                                                                                                                                                                                                                                                                                                                                                                                                                                                                                                                                                                                                                                                                                                                                                                                                                                                                                                                                                                                                                                                                                                                                                                                                                                                                                                                                                                                                                                                                                                                                                                                                                                                                                                                                                                                                                                                                                                                                              |
| <b>Keywords:</b>               | Health facility delivery; Institutional delivery; Facility based delivery; determinants; trends; Spatial patterns; Nigeria                                                                                                                                                                                                                                                                                                                                                                                                                                                                                                                                                                                                                                                                                                                                                                                                                                                                                                                                                                                                                                                                                                                                                                                                                                                                                                                                                                                                                                                                                                                                                                                                                                                                                                                                                                                                                                                                                                                                                           |
| <b>Abstract:</b>               | <p><b>Background:</b> Globally, about 810 women die daily from pregnancy and childbirth complications, and the burden is highest in Africa. The United Nations sustainable development goal has a maternal mortality ratio (MMR) target of 70 per 100,000 live births by 2030. Nigeria, the largest country in Africa, has an MMR of 512 per 100,000 live births, thus there is need for intensified efforts to reduce maternal deaths in the country. Proper utilisation of maternal health services including health facilities for delivery is crucial to achieving this. This study assesses the regional trends, spatial patterns and determinants of health facility delivery among women of reproductive age in Nigeria.</p> <p><b>Methods:</b> This is a weighted secondary analysis of the Nigerian Demographic and Health Survey (NDHS). The sample included women who had a live birth in the preceding 5 years of the NDHS 2008, 2013 and 2018. Bivariate analysis and multilevel logistic regression were carried out to assess the determinants of health facility delivery. Trends analysis was done using bar graphs and spatial analysis showed the distribution of health facility delivery by State.</p> <p><b>Results:</b> Forty-one percent of women delivered their last child in a health facility. The proportion of women who delivered at a health facility increased from 2008 to 2018 for all regions, with exception of the South-south region. Determinants of facility-based delivery include; ethnicity, level of education, wealth index, exposure to mass media (AOR 1.34; 95% CI 1.20 – 1.50), number of childbirths, number of antenatal visits (AOR 4.03; 95% CI 3.51 – 4.62), getting a companion to go the health facility (AOR 0.84; 95% CI 0.72 – 0.98), community level poverty, community level of female education, community distance to health facility, and geographical region.</p> <p><b>Conclusion:</b> There is an urgent need to deploy appropriate strategies and programme to improve health facility delivery in Nigeria.</p> |
| <b>Order of Authors:</b>       | <p>Tope Olubodun, MD, MPH.</p> <p>Olorunfemi Akinbode Ogundele</p> <p>Turnwait Otu Michael</p> <p>Oluyemi A Okunlola</p> <p>Ayodeji Bamidele Olubodun</p> <p>Semiu Adebayo Rahman</p>                                                                                                                                                                                                                                                                                                                                                                                                                                                                                                                                                                                                                                                                                                                                                                                                                                                                                                                                                                                                                                                                                                                                                                                                                                                                                                                                                                                                                                                                                                                                                                                                                                                                                                                                                                                                                                                                                                |
| <b>Additional Information:</b> |                                                                                                                                                                                                                                                                                                                                                                                                                                                                                                                                                                                                                                                                                                                                                                                                                                                                                                                                                                                                                                                                                                                                                                                                                                                                                                                                                                                                                                                                                                                                                                                                                                                                                                                                                                                                                                                                                                                                                                                                                                                                                      |
| <b>Question</b>                | <b>Response</b>                                                                                                                                                                                                                                                                                                                                                                                                                                                                                                                                                                                                                                                                                                                                                                                                                                                                                                                                                                                                                                                                                                                                                                                                                                                                                                                                                                                                                                                                                                                                                                                                                                                                                                                                                                                                                                                                                                                                                                                                                                                                      |
| <b>Financial Disclosure</b>    | The author(s) received no specific funding for this work.                                                                                                                                                                                                                                                                                                                                                                                                                                                                                                                                                                                                                                                                                                                                                                                                                                                                                                                                                                                                                                                                                                                                                                                                                                                                                                                                                                                                                                                                                                                                                                                                                                                                                                                                                                                                                                                                                                                                                                                                                            |

Enter a financial disclosure statement that describes the sources of funding for the work included in this submission. Review the [submission guidelines](#) for detailed requirements. View published research articles from [PLOS ONE](#) for specific examples.

This statement is required for submission and **will appear in the published article** if the submission is accepted. Please make sure it is accurate.

#### Funded studies

Enter a statement with the following details:

- Initials of the authors who received each award
- Grant numbers awarded to each author
- The full name of each funder
- URL of each funder website
- Did the sponsors or funders play any role in the study design, data collection and analysis, decision to publish, or preparation of the manuscript?

Did you receive funding for this work?

#### Competing Interests

Use the instructions below to enter a competing interest statement for this submission. On behalf of all authors, disclose any [competing interests](#) that could be perceived to bias this work—acknowledging all financial support and any other relevant financial or non-financial competing interests.

This statement is **required** for submission and **will appear in the published article** if the submission is accepted. Please make sure it is accurate and that any funding sources listed in your Funding Information later in the submission form are also declared in your Financial Disclosure statement.

The authors have declared that no competing interests exist

View published research articles from [PLOS ONE](#) for specific examples.

**NO authors have competing interests**

Enter: *The authors have declared that no competing interests exist.*

**Authors with competing interests**

Enter competing interest details beginning with this statement:

*I have read the journal's policy and the authors of this manuscript have the following competing interests: [insert competing interests here]*

\* typeset

**Ethics Statement**

Enter an ethics statement for this submission. This statement is required if the study involved:

- Human participants
- Human specimens or tissue
- Vertebrate animals or cephalopods
- Vertebrate embryos or tissues
- Field research

Write "N/A" if the submission does not require an ethics statement.

General guidance is provided below. Consult the [submission guidelines](#) for detailed instructions. **Make sure that all information entered here is included in the Methods section of the manuscript.**

Being a secondary data analysis, ethical approval was not required for this study. We registered and obtained permission to download the datasets from the measure DHS website. However, in the primary studies – The NDHS 2008, 2013, and 2018, the survey protocols were approved after review by the ICF Institutional Review Board and the National Health Research Ethics Committee of Nigeria (NHREC). Informed consent was obtained, and all methods were performed in accordance with the Declaration of Helsinki.

## Format for specific study types

### Human Subject Research (involving human participants and/or tissue)

- Give the name of the institutional review board or ethics committee that approved the study
- Include the approval number and/or a statement indicating approval of this research
- Indicate the form of consent obtained (written/oral) or the reason that consent was not obtained (e.g. the data were analyzed anonymously)

### Animal Research (involving vertebrate animals, embryos or tissues)

- Provide the name of the Institutional Animal Care and Use Committee (IACUC) or other relevant ethics board that reviewed the study protocol, and indicate whether they approved this research or granted a formal waiver of ethical approval
- Include an approval number if one was obtained
- If the study involved *non-human primates*, add *additional details* about animal welfare and steps taken to ameliorate suffering
- If anesthesia, euthanasia, or any kind of animal sacrifice is part of the study, include briefly which substances and/or methods were applied

### Field Research

Include the following details if this study involves the collection of plant, animal, or other materials from a natural setting:

- Field permit number
- Name of the institution or relevant body that granted permission

### Data Availability

Authors are required to make all data underlying the findings described fully available, without restriction, and from the time of publication. PLOS allows rare exceptions to address legal and ethical concerns. See the [PLOS Data Policy](#) and [FAQ](#) for detailed information.

No - some restrictions will apply

A Data Availability Statement describing where the data can be found is required at submission. Your answers to this question constitute the Data Availability Statement and **will be published in the article**, if accepted.

**Important:** Stating 'data available on request from the author' is not sufficient. If your data are only available upon request, select 'No' for the first question and explain your exceptional situation in the text box.

Do the authors confirm that all data underlying the findings described in their manuscript are fully available without restriction?

**Describe where the data may be found in full sentences. If you are copying our sample text, replace any instances of XXX with the appropriate details.**

- If the data are **held or will be held in a public repository**, include URLs, accession numbers or DOIs. If this information will only be available after acceptance, indicate this by ticking the box below. For example: *All XXX files are available from the XXX database (accession number(s) XXX, XXX).*
- If the data are all contained **within the manuscript and/or Supporting Information files**, enter the following: *All relevant data are within the manuscript and its Supporting Information files.*
- If neither of these applies but you are able to provide **details of access elsewhere**, with or without limitations, please do so. For example:

*Data cannot be shared publicly because of [XXX]. Data are available from the XXX Institutional Data Access / Ethics Committee (contact via XXX) for researchers who meet the criteria for access to confidential data.*

*The data underlying the results presented in the study are available from (include the name of the third party*

The data underlying the results presented in the study are available after registration and request from measure DHS website (<https://dhsprogram.com>).

*and contact information or URL).*

- This text is appropriate if the data are owned by a third party and authors do not have permission to share the data.

\* typeset

Additional data availability information:

1 **Title: Regional Trends, Spatial Patterns and Determinants**  
2 **of Health Facility Delivery Among Women of Reproductive**  
3 **Age in Nigeria: A National Population Based Cross-**  
4 **Sectional Study**

5  
6 **Short Title: Regional Trends, Spatial Patterns and**  
7 **Determinants of Health Facility Delivery Among Women in**  
8 **Nigeria**

9  
10 **Authors**

11 Tope Olubodun<sup>1\*</sup>, Olorunfemi Akinbode Ogundele<sup>2</sup>, Turnwait Otu Michael<sup>3</sup>, Oluyemi  
12 A. Okunlola<sup>4</sup>, Ayodeji Bamidele Olubodun<sup>5</sup>, Semiu Adebayo Rahman<sup>6</sup>

13  
14  
15 1 Department of Community Medicine and Primary Care, Federal Medical Center,  
16 Abeokuta, Ogun State, Nigeria

17 Email: [oluboduntope@gmail.com](mailto:oluboduntope@gmail.com)

18 Phone number: +2348173353388

19  
20 2 Department of Community Medicine, University of Medical Sciences, Ondo City,  
21 Nigeria

22  
23 3 Department of Sociology, University of Johannesburg, South Africa

24  
25 4 Department of Mathematical and Computer Sciences, University of Medical  
26 Sciences, Ondo City, Nigeria

27  
28 5 Olabisi Onabanjo University Teaching Hospital, Nigeria.

29  
30 6 Department of Demography and Social Statistics, Obafemi Awolowo University, Ile  
31 Ife, Osun State, Nigeria.

32  
33  
34  
35  
36 \*Corresponding author (TO)

37 [oluboduntope@gmail.com](mailto:oluboduntope@gmail.com)

## 40 **Abstract**

41 **Background:** Globally, about 810 women die daily from pregnancy and childbirth  
42 complications, and the burden is highest in Africa. The United Nations sustainable  
43 development goal has a maternal mortality ratio (MMR) target of 70 per 100,000 live births by  
44 2030. Nigeria, the largest country in Africa, has an MMR of 512 per 100,000 live births, thus  
45 there is need for intensified efforts to reduce maternal deaths in the country. Proper utilisation  
46 of maternal health services including health facilities for delivery is crucial to achieving this.  
47 This study assesses the regional trends, spatial patterns and determinants of health facility  
48 delivery among women of reproductive age in Nigeria.

49 **Methods:** This is a weighted secondary analysis of the Nigerian Demographic and Health  
50 Survey (NDHS). The sample included women who had a live birth in the preceding 5 years of  
51 the NDHS 2008, 2013 and 2018. Bivariate analysis and multilevel logistic regression were  
52 carried out to assess the determinants of health facility delivery. Trends analysis was done using  
53 bar graphs and spatial analysis showed the distribution of health facility delivery by State.

54 **Results:** Forty-one percent of women delivered their last child in a health facility. The  
55 proportion of women who delivered at a health facility increased from 2008 to 2018 for all  
56 regions, with exception of the South-south region. Determinants of facility-based delivery  
57 include; ethnicity, level of education, wealth index, exposure to mass media (AOR 1.34; 95%  
58 CI 1.20 – 1.50), number of childbirths, number of antenatal visits (AOR 4.03; 95% CI 3.51 –  
59 4.62), getting a companion to go the health facility (AOR 0.84; 95% CI 0.72 – 0.98),  
60 community level poverty, community level of female education, community distance to health  
61 facility, and geographical region.

62 **Conclusion:** There is an urgent need to deploy appropriate strategies and programme to  
63 improve health facility delivery in Nigeria.

64



## 65 Introduction

66 Delivery in a health facility by skilled birth attendants and with available life-saving  
67 commodities and facilities reduces maternal morbidity and morbidity significantly [1,2].  
68 Health facility delivery also reduces stillbirth rate and neonatal morbidity [3,4]. Recognising  
69 the importance of health facility delivery, the World Health Organization (2023) recommends  
70 that all births take place at health facilities with the assistance of skilled birth attendants. In  
71 2021, 84% of births worldwide happened in health facilities [5]. The proportion of facility  
72 delivery varies greatly among countries. Almost all newborns (99%) are born at a health facility  
73 in developed countries [5]. Only 64% of babies in Sub-Saharan Africa (SSA) have skilled birth  
74 assistance during delivery [5]. Others give birth at home with the help of inexperienced birth  
75 attendants, family members, or self-delivery [6].

76  
77 In Nigeria, only 41% of Nigerian women deliver in health facilities. [7]. Variations in health  
78 facility delivery exist across Nigerian geopolitical zones, ranging from 16% in the Northwest  
79 zones to 81% in the Southeast zones [8]. Tackling the challenges associated with health-care  
80 delivery is critical, especially in Nigeria, where the crude birth rate is an estimated 38 births  
81 per 1000 women [8], with a total fertility rate of 5.3 [8]. Disregarding adequate actions to  
82 improve health facility delivery in Nigeria will exacerbate the country's already high maternal  
83 mortality rate (MMR) of 512 per 100,000 live births, which makes Nigeria still a long way  
84 from meeting the Sustainable Development Goal of fewer than 70 maternal deaths per 100,000  
85 live births by 2030 [9].

86  
87 To enhance maternal health in Nigeria, the Midwives Service Scheme and the Subsidy  
88 Reinvestment and Empowerment Programme (SURE-P) were introduced [10,11]. The  
89 Midwives service scheme was introduced in 2009 to improve availability of skilled birth

90 attendants in rural areas of the country [10]. The program engages retired midwives,  
91 unemployed and newly graduated midwives to work temporarily in rural areas. In 2012, SURE-  
92 P was introduced in a bid to re-invest fuel subsidy funds into social safety net programs  
93 including improving maternal health. SURE – P includes a conditional cash transfer for  
94 mothers attending at least four antenatal visits, delivering in a health facility, and also attending  
95 postnatal care visits, health facility renovations and staffing, ensuring supply of essential  
96 maternal health commodities, and community mobilization through village health workers and  
97 community leaders [11]. Both programmes had some successes [10,11], however, in 2018, only  
98 41% of Nigerian women in Nigeria delivered at a health facility [7]

99

100 Some studies have been carried out using nationally representative data to assess health facility  
101 delivery in Nigeria. Our study adds to the body of knowledge from these studies. Ononokpono  
102 et al. identified the determinants of health facility delivery among Nigerian women using data  
103 from the 2008 NDHS [12]. Adedokun identified the factors associated with home delivery  
104 among Nigerian women and conducted a spatial analysis to capture the locations where home  
105 delivery is prevalent in the country using data from the 2013 NDHS [13]. Dahiru et al on the  
106 other hand assessed the determinants of antenatal care, health facility delivery and postnatal  
107 care among women in Nigeria using the 2018 NDHS, but only included individual level  
108 variables in analysis and did not account for the hierarchical nature of the NDHS [14]. Solanke  
109 et al. assessed the determinants of health facility delivery with emphasis on community level  
110 factors but only examined a few individual factors [15].

111

112 Our study is different from these studies as we assess the regional trends, spatial patterns, and  
113 determinants of health facility delivery among women of reproductive age in Nigeria. Unlike  
114 Ononokpono, we use the most recent DHS to provide more recent estimates. Unlike Adedokun

115 et al, we examine the regional trends, determinants, and spatial patterns of health facility  
116 delivery rather than home delivery. Unlike Dahiru et. al. we use a multilevel approach which  
117 takes into account the hierarchical nature of the DHS, and unlike Solanke et al, we include a  
118 significant number of individual level factors and community level factors. Our study thus  
119 provides recent estimates of the determinants of health facility delivery, examines the trends in  
120 health facility delivery over ten years and across the six geopolitical zones, and uses spatial  
121 analysis to demonstrate parts of the country with high, medium, and low prevalence of health  
122 facility delivery. These findings will provide evidence that can guide policy and programming  
123 in maternal health in Nigeria.

124  
125  
126  
127  
128  
129  
130  
131  
132  
133  
134  
135  
136  
137  
138  
139  
140

## 141 **Methods**

### 142 **Data Source**

143 Data from Nigeria Demographic and health surveys were used in this study. The trend analysis  
144 made use of data from NDHS 2008, NDHS 2013 and NDHS 2018 to analyze the trend of health  
145 facility delivery across these years, and across the six geo-political zones. Analysis of the  
146 determinants of health facility delivery and the spatial analysis of the distribution of health  
147 facility delivery across States was done using data from the most recent NDHS i.e., NDHS  
148 2018. Demographic and Health Surveys (DHS) are nationally representative household surveys  
149 that provide data for a wide range of indicators in the areas of population, health, and nutrition  
150 [16]. They are usually carried out every five years and the data can be used for monitoring and  
151 impact evaluation and research [16].

152

153 NDHS uses a two-stage cluster sampling approach to select respondents from rural and urban  
154 areas in Nigeria and from the 36 States and the FCT. The primary sampling units (PSU)/clusters  
155 are the enumeration areas (EAs) from the 2006 census and the Population and Housing Census  
156 of the Federal Republic of Nigeria (NPHC), conducted in 2006 provides the sampling frame  
157 [8].

158

### 159 **Study variables**

#### 160 **Outcome variable**

161 The outcome variable is facility-based delivery of the most recent birth. Births in a public or  
162 private health facility was defined as ‘utilized health facility delivery’ and coded as 1, while  
163 those who delivered at home or elsewhere were defined as ‘not utilizing health facility delivery  
164 and was coded as 0.

165

166 **Exposure variables**

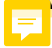

167 Age at last childbirth was derived by subtracting the date of birth of mother (in century month  
168 code CMC) from date of birth of child (in century month code) and dividing by 12. Age group  
169 was then categorized as 15 – 19 years, 20 – 29 years, 30 – 39 years, 40 – 49 years. Women that  
170 were never in union and those that were formerly in union/living with a man were categorized  
171 as ‘not married’ and those currently in union/living with a man were grouped as ‘married’.  
172 Religion was categorised as Christianity, Islam, and Traditional religion. Ethnicity was  
173 categorised as Hausa/Fulani, Yoruba, Ibo, and Others. Level of education was expressed as no  
174 education, primary, secondary, and higher. Respondents’ employment status was categorized  
175 as ‘currently working’ and ‘not currently working’. Wealth index was generated as a tertile of  
176 the wealth index factor score into poor, middle and rich.

177

178 Mass media exposure was generated from exposure to television, radio, and newspaper. Mass  
179 media exposure was defined as frequent exposure for those with at least once a week exposure  
180 to television, radio or newspaper, and No exposure/infrequent exposure for those who had no  
181 access to any of these or less than once a week exposure to any of these. Wanted index  
182 pregnancy was recoded as ‘wanted’ or ‘not wanted’. Number of childbirths was categorized as  
183 1 – 2, 3 - 4,  $\geq 5$ . Number of antenatal care (ANC) visits was categorized as less than four ANC  
184 visits, and at least four ANC visits. Companionship to health facility was categorized as being  
185 ‘a big problem’ and ‘not a big problem’. Woman’s participation in healthcare decision was  
186 recoded as participate and does not participate. Partner’s education was expressed as no  
187 education, primary, secondary, and higher.

188

189 The following factors were considered at community level: community level poverty,  
190 community level women's education, community distance to health facility, place of residence  
191 (urban or rural) and region. Region was used as provided in the NDHS dataset as Northcentral,  
192 Northeast, Northwest Southeast, South-south and Southwest. Other community level variables  
193 were computed by aggregating individual characteristics at the cluster level, dividing the  
194 measure into tertiles, and categorizing as low, medium and high. Similar procedure has been  
195 widely applied to derive community variables in DHS datasets [13,15]. Community level  
196 poverty was defined as the proportion of women who are from the poorest communities.  
197 Community women's education was defined as proportion of women from community with at  
198 least secondary education. Community distance to health facility was defined as the proportion  
199 of women for whom distance to health facility is a big problem, aggregated at cluster level.

200

## 201 **Data analysis**

202 Data analysis was done using Stata (17, StataCorp LLC, College Station, TX, USA). In DHS  
203 analysis, in order to adjust for multi-level cluster sampling design and non-response, individual  
204 women's survey weights are needed. Therefore, we adjusted for sampling weights, clustering,  
205 and stratification. Descriptive analysis included the trends analysis and frequency distribution  
206 to present background characteristics. Trend analysis was presented in bar charts.

207

208 **Bivariate analysis** was done using Chi-Square test to test the association between the  
209 independent variables and place of delivery. Taking into consideration the hierarchical structure  
210 of the DHS, a multilevel logistic regression analysis was done to identify the determinants of  
211 health facility delivery. Observations with missing data were excluded from the multivariate  
212 analysis. The variable marital status displayed collinearity and was not included in the  
213 multivariate analysis. To create spatial maps for health facility delivery coverage in Nigeria, a

214 sampling dataset was used and analysed using the QGIS 3.321 (<https://qgis.org/en/site/>). In  
215 order to normalize the dataset and make it easier to integrate into the database and visualize in  
216 QGIS, the data structure was created using Google Sheets. The attribute data was then  
217 combined with the spatial data using the Join Attribute by Location Tool in QGIS. This  
218 produced a database that contained the health facility delivery results along with the Nigeria  
219 shape file sourced from the Natural Earth database. To graphically represent each point of the  
220 attribute data for the variables in QGIS, the Equal Count (Quantile) mode and five classes were  
221 employed. The classes show the proportion of each attribute's data that is contained in the  
222 database, and this information was displayed using different colour ramps. This step is crucial  
223 in the data cleaning process and helps to ensure that the data is accurately represented in the  
224 visualization.

225

## 226 **Ethical approval**

227 Being a secondary data analysis, ethical approval was not required for this study. We registered  
228 and obtained permission to download the datasets from the measure DHS website. However,  
229 in the primary studies – The NDHS 2008, 2013, and 2018, the survey protocols were approved  
230 after review by the ICF Institutional Review Board and the National Health Research Ethics  
231 Committee of Nigeria (NHREC). Informed consent was obtained, and all methods were  
232 performed in accordance with the Declaration of Helsinki.

233

234

235

236

237

238

239

240

241 **Results**

242 Forty-one percent of women delivered their last child in a health facility. Most (49.26%) of the  
243 respondents were of the 20 – 29 years age group. Sixty-one percent were Muslims, 46.42%  
244 were of the Hausa/Fulani tribe, 44.44% had no formal education and 68.39% were employed.  
245 Majority (60.12%) of the respondents were not exposed to mass media, or had infrequent  
246 exposure, majority (87.85%) desired the index pregnancy, and more than half (57.79%) had at  
247 least four antenatal visits. Majority (83.60%) found companionship to the health facility as “not  
248 a big problem” but only 38.40% of the women participated in decisions regarding their health.  
249 Most of the women (60.24%) resided in rural areas. (Table 1)

250  
251  
252  
253  
254  
255  
256  
257  
258  
259  
260  
261  
262  
263  
264  
265  
266  
267  
268  
269  
270



271  
272

**Table 1: Sample Characteristics and Prevalence of Health Facility Delivery among Women of Reproductive Age in Nigeria. (NDHS 2018) (N = 21,792)**

| <b>Variables</b>                         | <b>Frequency</b> | <b>Percentage</b> |
|------------------------------------------|------------------|-------------------|
| <b>Facility based delivery</b>           |                  |                   |
| Utilized health facility delivery        | 9001             | 41.14             |
| Did not utilize health facility delivery | 12791            | 58.86             |
| <b>Age at last childbirth</b>            |                  |                   |
| 15 – 19                                  | 2631             | 12.20             |
| 20 – 29                                  | 10685            | 49.26             |
| 30 – 39                                  | 7180             | 32.76             |
| 40 - 49                                  | 1296             | 5.781             |
| <b>Marital status</b>                    |                  |                   |
| Not married                              | 1373             | 5.81              |
| Married                                  | 20419            | 94.19             |
| <b>Religion</b>                          |                  |                   |
| Christianity                             | 8929             | 38.08             |
| Islam                                    | 12687            | 61.39             |
| Traditional religion/others              | 176              | 0.53              |
| <b>Ethnicity*</b>                        |                  |                   |
| Hausa/Fulani                             | 9226             | 46.42             |
| Yoruba                                   | 2357             | 12.61             |
| Ibo                                      | 2836             | 12.62             |
| Others                                   | 7355             | 28.35             |
| <b>Level of education</b>                |                  |                   |
| No formal education                      | 9527             | 44.44             |
| Primary education                        | 3410             | 15.03             |
| Secondary education                      | 7064             | 31.77             |
| Higher                                   | 1791             | 8.76              |
| <b>Employment status</b>                 |                  |                   |
| Unemployed                               | 6977             | 31.61             |
| Employed                                 | 14815            | 68.39             |
| <b>Wealth index</b>                      |                  |                   |
| Poor                                     | 7264             | 31.72             |
| Middle                                   | 7264             | 32.29             |
| Rich                                     | 7264             | 35.99             |
| <b>Exposure to mass media</b>            |                  |                   |
| No exposure/infrequent exposure          | 13,446           | 60.12             |
| Frequent exposure                        | 8346             | 39.88             |
| <b>Wanted index pregnancy</b>            |                  |                   |
| Wanted                                   | 19054            | 87.85             |

|                                              |       |       |
|----------------------------------------------|-------|-------|
| Not wanted                                   | 2738  | 12.15 |
| <b>Number of childbirths</b>                 |       |       |
| 1 - 2                                        | 7493  | 35.06 |
| 3 - 4                                        | 6233  | 28.16 |
| ≥ 5                                          | 8066  | 36.79 |
| <b>Number of antenatal visits*</b>           |       |       |
| < 4 visits                                   | 9158  | 42.21 |
| At least 4 visits                            | 12307 | 57.79 |
| <b>Companionship to health facility</b>      |       |       |
| A big problem                                | 3574  | 16.40 |
| Not a big problem                            | 18218 | 83.60 |
| <b>Participates in healthcare decision.</b>  |       |       |
| Participates                                 | 8309  | 38.40 |
| Does not participate                         | 13483 | 61.60 |
| <b>Partner's highest level of education*</b> |       |       |
| No formal education                          | 7141  | 36.14 |
| Primary education                            | 2897  | 13.95 |
| Secondary education                          | 7060  | 34.46 |
| Higher                                       | 3039  | 15.44 |
| <b>Community poverty</b>                     |       |       |
| Low                                          | 10292 | 48.89 |
| Medium                                       | 4299  | 20.71 |
| High                                         | 7201  | 30.41 |
| <b>Community women's education</b>           |       |       |
| Low                                          | 7285  | 34.29 |
| Medium                                       | 7253  | 32.73 |
| High                                         | 7254  | 32.99 |
| <b>Community distance to health facility</b> |       |       |
| Low                                          | 7281  | 35.28 |
| Medium                                       | 7319  | 33.54 |
| High                                         | 7192  | 31.19 |
| <b>Place of residence</b>                    |       |       |
| Urban                                        | 7710  | 39.76 |
| Rural                                        | 14082 | 60.24 |
| <b>Region</b>                                |       |       |
| Northcentral                                 | 3875  | 13.83 |
| Northeast                                    | 4506  | 17.63 |
| Northwest                                    | 6309  | 34.89 |
| Southeast                                    | 2365  | 9.75  |
| South-south                                  | 2174  | 9.21  |

|           |      |       |
|-----------|------|-------|
| Southwest | 2563 | 14.69 |
|-----------|------|-------|

273 \*Variables with missing data

274

275 The proportion of women who delivered at a health facility increased from 2008 to 2018 for

276 all regions, with exception of the South-south region where facility-based delivery remained

277 almost constant in 2013 and 2018. The Northwest had the lowest prevalence of health facility

278 delivery of 9.34% in 2008, 12.8% in 2013 and 16.36% in 2018, while the Southeast had the

279 highest prevalence of 73.84% in 2008, 78.83% in 2013 and 80.8% in 2018. In Nigeria, health

280 facility delivery increased slightly from 36.57% in 2008 to 37.44% in 2013 and then to 41.14%

281 in 2018 (Figure 1).

282

283

284 **Figure 1: Regional trends of health facility delivery in Nigeria (NDHS 2008, NDHS 2013,**  
 285 **NDHS 2018)**

286

287 Table 2 shows that all the independent variables showed statistically significant association

288 with the outcome variable ‘health facility delivery’. Higher proportion of women of the age

289 group 20 – 29 years (41.37%) and 30 – 39 years (46.07%) delivered in a health facility

290 compared to older women aged 40 – 49 years (36.03%) and younger women aged 15 – 19 years

291 (29.44%). A higher proportion of Christian women (65.75%) than Muslim women (25.98%)

292 and women of traditional religion (29.14%) delivered in a health facility. Igbo women had the

293 highest utilization of health facility for delivery (81.30%), followed by Yoruba women

294 (75.29%), then other minority tribes (46.81%) and Hausa/Fulani women (17.46%). While

295 majority of women with higher than secondary education (87.71%) delivered in a health

296 facility, only 15.14% of women without formal education delivered in a health facility. While

297 69.69% of women from the rich wealth tertile delivered in a health facility, only 13.99% of

298 women from the poor wealth tertile delivered in a health facility (Table 2).

299

300 **Table 2: Bivariate analysis of factors associated with health facility delivery among**  
 301 **women of reproductive age in Nigeria (NDHS 2018) (N = 21,792)**

| Variables                       | Facility based delivery                  |                                   | p-value |
|---------------------------------|------------------------------------------|-----------------------------------|---------|
|                                 | Did not utilise health facility delivery | Utilised health facility delivery |         |
|                                 | Freq (%)                                 | Freq (%)                          |         |
| <b>Age at last childbirth</b>   |                                          |                                   |         |
| 15 – 19 years                   | 1821 (70.56)                             | 810 (29.44)                       | <0.0001 |
| 20 – 29 years                   | 6289 (58.63)                             | 4396 (41.37)                      |         |
| 30 – 39 years                   | 3876 (53.93)                             | 3304 (46.07)                      |         |
| 40 – 49 years                   | 805 (63.97)                              | 491 (36.03)                       |         |
| <b>Marital Status</b>           |                                          |                                   |         |
| Not married                     | 687 (48.09)                              | 686 (51.91)                       | <0.0001 |
| Married                         | 12104 (59.52)                            | 8315 (40.48)                      |         |
| <b>Religion</b>                 |                                          |                                   |         |
| Christianity                    | 3306 (34.25)                             | 5623 (65.75)                      | <0.0001 |
| Islam                           | 9357 (74.02)                             | 3330 (25.98)                      |         |
| Traditional                     | 128 (70.86)                              | 48 (29.14)                        |         |
| <b>Ethnicity*</b>               |                                          |                                   |         |
| Hausa/Fulani                    | 7589 (82.54)                             | 1637 (17.46)                      | <0.0001 |
| Yoruba                          | 550 (24.71)                              | 1807 (75.29)                      |         |
| Ibo                             | 559 (18.7)                               | 2277 (81.3)                       |         |
| Others                          | 4087 (53.87)                             | 3268 (46.81)                      |         |
| <b>Level of education</b>       |                                          |                                   |         |
| No formal education             | 8065 (84.86)                             | 1462 (15.14)                      | <0.0001 |
| Primary education               | 1960 (58.47)                             | 1450 (41.53)                      |         |
| Secondary education             | 2537 (35.49)                             | 4527 (64.51)                      |         |
| Higher                          | 229 (12.29)                              | 1562 (87.71)                      |         |
| <b>Employment status</b>        |                                          |                                   |         |
| Unemployed                      | 4878 (70.89)                             | 2099 (29.11)                      | <0.0001 |
| Employed                        | 7913 (53.29)                             | 6902 (46.71)                      |         |
| <b>Wealth index</b>             |                                          |                                   |         |
| Poor                            | 6171 (86.01)                             | 1093 (13.99)                      | <0.0001 |
| Middle                          | 4446 (64.00)                             | 2818 (36.00)                      |         |
| Rich                            | 2174 (30.31)                             | 5090 (69.69)                      |         |
| <b>Exposure to mass media</b>   |                                          |                                   |         |
| No exposure/infrequent exposure | 9457 (71.42)                             | 3989 (28.58)                      | <0.0001 |
| Frequent exposure               | 3334 (39.90)                             | 5012 (60.10)                      |         |
| <b>Wanted index pregnancy</b>   |                                          |                                   |         |
| Wanted                          | 11459 (60.38)                            | 7595 (39.62)                      | <0.0001 |
| Not wanted                      | 1332 (47.79)                             | 1406 (52.21)                      |         |

|                                              |               |              |         |
|----------------------------------------------|---------------|--------------|---------|
| <b>Number of childbirths</b>                 |               |              |         |
| 1 – 2                                        | 3777 (49.59)  | 3716 (50.41) | <0.0001 |
| 3 – 4                                        | 3448 (55.34)  | 2785 (44.66) |         |
| ≥ 5                                          | 5566 (70.38)  | 2500 (29.62) |         |
| <b>Number of antenatal visits*</b>           |               |              |         |
| < 4 visits                                   | 7742 (85.03)  | 1416 (14.97) | <0.0001 |
| At least 4 visits                            | 4941 (40.69)  | 7366 (59.31) |         |
| <b>Companionship to health facility</b>      |               |              |         |
| A big problem                                | 2600 (70.31)  | 974 (29.69)  | <0.0001 |
| Not a big problem                            | 10191 (56.72) | 8027 (43.28) |         |
| <b>Participates in healthcare decision.</b>  |               |              |         |
| Participates                                 | 3585 (42.13)  | 4724 (57.87) | <0.0001 |
| Does not participate                         | 9206 (69.28)  | 4277 (30.72) |         |
| <b>Partner's highest level of education*</b> |               |              |         |
| No formal education                          | 6236 (87.43)  | 905 (12.57)  | <0.0001 |
| Primary education                            | 1719 (60.69)  | 1178 (39.31) |         |
| Secondary education                          | 3063 (43.03)  | 3997 (56.97) |         |
| Higher                                       | 888 (28.87)   | 2151 (71.13) |         |
| <b>Community poverty</b>                     |               |              |         |
| Low                                          | 3733 (37.34)  | 6559 (62.66) | <0.0001 |
| Medium                                       | 2974 (70.92)  | 1325 (29.08) |         |
| High                                         | 6084 (85.23)  | 1117 (14.77) |         |
| <b>Community education</b>                   |               |              |         |
| Low                                          | 6544 (90.08)  | 741 (9.917)  | <0.0001 |
| Medium                                       | 4195 (58.38)  | 3058 (41.62) |         |
| High                                         | 2052 (26.87)  | 5202 (73.13) |         |
| <b>Community distance to health facility</b> |               |              |         |
| Low                                          | 3453 (49.5)   | 3828 (50.5)  | <0.0001 |
| Medium                                       | 4132 (57.08)  | 3187 (42.92) |         |
| High                                         | 5206 (71.35)  | 1986 (28.65) |         |
| <b>Place of residence</b>                    |               |              |         |
| Urban                                        | 2955 (37.88)  | 4755(62.12)  | <0.0001 |
| Rural                                        | 9838 (72.70)  | 4246 (27.30) |         |
| <b>Region</b>                                |               |              |         |
| Northcentral                                 | 1878 (49.63)  | 1997 (50.37) | <0.0001 |
| Northeast                                    | 3337 (73.32)  | 1169 (26.68) |         |
| Northwest                                    | 5320 (83.64)  | 989 (16.36)  |         |
| Southeast                                    | 478 (19.2)    | 1887 (80.80) |         |
| South-south                                  | 1176 (49.1)   | 998 (50.90)  |         |
| South west                                   | 602 (23.8)    | 1961 (76.20) |         |

302 \*Variables with missing data

303

304 A greater proportion of women with frequent exposure to mass media (60.10%) delivered in a  
305 health facility compared to those with infrequent or no exposure to mass media (28.58%). The  
306 proportion that reported delivery of their last child in a health facility was higher among women  
307 who did not desire the index pregnancy (52.21%) than for women who desired the index  
308 pregnancy (39.62%). The proportion that reported delivery of their last child in a health facility  
309 was higher among women with at least four antenatal visits (59.31%) than for women with less  
310 than four visits (14.97%). A greater proportion of women who reported companionship to  
311 health facility as not a big problem and those who participate in decisions regarding their health  
312 delivered in a health facility than women who reported companionship to health facility as a  
313 big problem and those who did not participate in decisions regarding their health, respectively.

314

315 The proportion of women who had their most recent birth in a health facility was highest for  
316 women whose partner had higher than secondary school education (71.13%) and lowest for  
317 women whose partners had no formal education. Communities with a low proportion of poor  
318 people, a low proportion of uneducated people, and a low proportion of people who considered  
319 distance to health facility as a big problem had higher rates of health facility delivery. A higher  
320 proportion of women in urban (62.12%) compared with women living in rural areas (27.30%)  
321 delivered in a health facility. The Northwest region had the lowest proportion (16.36%) of  
322 women delivering in health facilities while the Southeast region (80.80%) had the highest  
323 proportion of women delivering in health facilities. (Table 2)

324

325

326

327

328

329 In Model 4, the final model which consisted of individual and community variables, Ibo women  
330 had 3 times higher odds of delivering in a health facility than Hausa/Fulani women (AOR 3.08;  
331 95% CI 2.11 – 4.49) and women from ethnic minorities had 50% higher odds of delivering in  
332 a health facility compared with Hausa/Fulani women (AOR 1.50; 95% CI 1.24 – 1.83). As level  
333 of education increased, the odds of delivering in a health facility also increased and similarly  
334 as partners level of education increased, the odds of delivering in a health facility increased.  
335 Compared with women from the poor wealth index, women of the middle wealth index had  
336 32% higher odds of delivering in a health facility (AOR 1.32; 95% CI 1.12 – 1.54) and women  
337 of the rich wealth index had 90% higher odds of delivering in a health facility (AOR 1.90; 95%  
338 CI 1.55 – 2.33). Women with frequent exposure to mass media had 34% higher odds of  
339 delivering in a health facility (AOR 1.34; 95% CI 1.20 – 1.50). The odds of delivering in a  
340 health facility reduced as number of childbirths increased. Women with at least four antenatal  
341 visits were 4 times more likely to deliver in a health facility than women with less than four  
342 antenatal visits (AOR 4.03; 95% CI 3.51 – 4.62). Women who reported getting a companion to  
343 go the health facility was a big problem were less likely to deliver in a health facility (AOR  
344 0.84; 95% CI 0.72 – 0.98). (Table 3)

345  
346  
347  
348  
349  
350  
351  
352  
353  
354  
355

356 **Table 3: Multilevel analysis showing determinants of health facility delivery among**  
 357 **women of reproductive age in Nigeria (NDHS 2018)**

| <b>Variables</b>                  | <b>Model 1</b>     | <b>Model 2</b>              | <b>Model 3</b>             | <b>Model 4</b>                        |
|-----------------------------------|--------------------|-----------------------------|----------------------------|---------------------------------------|
|                                   | <b>Empty Model</b> | <b>Individual variables</b> | <b>Community variables</b> | <b>Individual/Community variables</b> |
|                                   |                    | <b>Adjusted Odds ratio</b>  | <b>Adjusted Odds ratio</b> | <b>Adjusted Odds ratio</b>            |
| <b>Age at last childbirth</b>     |                    |                             |                            |                                       |
| 15 – 19 years                     |                    | 1                           |                            | 1                                     |
| 20 – 29 years                     |                    | 0.90 (0.76 – 1.07)          |                            | 0.86 (0.72 – 1.02)                    |
| 30 – 39 years                     |                    | 1.14 (0.93 – 1.41)          |                            | 1.07 (0.87 – 1.32)                    |
| 40 – 49 years                     |                    | 1.25 (0.95 – 1.65)          |                            | 1.16 (0.88 – 1.53)                    |
| <b>Religion</b>                   |                    |                             |                            |                                       |
| Christianity                      |                    | 1                           |                            | 1                                     |
| Islam                             |                    | 0.96 (0.81 – 1.14)          |                            | 1.06 (0.89 – 1.27)                    |
| Traditional/others                |                    | 0.62 (0.34 – 1.12)          |                            | 0.87 (0.48 – 1.57)                    |
| <b>Ethnicity</b>                  |                    |                             |                            |                                       |
| Hausa/Fulani                      |                    | 1                           |                            | 1                                     |
| Yoruba                            |                    | 4.15 (3.18 – 5.40) ***      |                            | 1.21 (0.89 – 1.65)                    |
| Ibo                               |                    | 9.46 (6.90 – 12.98) ***     |                            | 3.08 (2.11 – 4.49) ***                |
| Others                            |                    | 2.25 (1.87 – 2.71) ***      |                            | 1.50 (1.24 – 1.83) ***                |
| <b>Highest level of education</b> |                    |                             |                            |                                       |
| No formal education               |                    | 1                           |                            | 1                                     |
| Primary education                 |                    | 1.36 (1.17 – 1.58) ***      |                            | 1.24 (1.07 – 1.44) **                 |
| Secondary education               |                    | 1.88 (1.60 – 2.20) ***      |                            | 1.67 (1.42 – 1.95) ***                |
| Higher                            |                    | 4.40 (3.36 – 5.76) ***      |                            | 3.82 (2.92 – 4.99) ***                |
| <b>Employment status</b>          |                    |                             |                            |                                       |
| Unemployed                        |                    | 1                           |                            | 1                                     |
| Employed                          |                    | 1.05 (0.93 – 1.17)          |                            | 1.05 (0.94 – 1.18)                    |
| <b>Wealth index</b>               |                    |                             |                            |                                       |
| Poor                              |                    | 1                           |                            | 1                                     |



|                                             |  |                        |  |                        |
|---------------------------------------------|--|------------------------|--|------------------------|
| Middle                                      |  | 1.71 (1.47 – 1.99) *** |  | 1.32 (1.12 – 1.54) **  |
| Rich                                        |  | 2.90 (2.39 – 3.50) *** |  | 1.90 (1.55 – 2.33) *** |
| <b>Exposure to mass media</b>               |  |                        |  |                        |
| Not exposed/infrequent exposure             |  | 1                      |  | 1                      |
| Frequent exposure                           |  | 1.35 (1.21 – 1.51) *** |  | 1.34 (1.20 – 1.50) *** |
| <b>Wanted index pregnancy</b>               |  |                        |  |                        |
| Wanted                                      |  | 1.17 (1.01 – 1.51) *   |  | 1.15 (0.99 – 1.34)     |
| Not wanted                                  |  | 1                      |  | 1                      |
| <b>Number of childbirths</b>                |  |                        |  |                        |
| 1 – 2                                       |  | 1                      |  | 1                      |
| 3 – 4                                       |  | 0.77 (0.67 – 0.87) *** |  | 0.77 (0.68 – 0.87) *** |
| ≥ 5                                         |  | 0.67 (0.57 – 0.78) *** |  | 0.68 (0.58 – 0.79) *** |
| <b>Number of antenatal visits</b>           |  |                        |  |                        |
| < 4 visits                                  |  | 1                      |  | 1                      |
| At least 4 visits                           |  | 4.17 (3.63 – 4.79) *** |  | 4.03 (3.51 – 4.62) *** |
| <b>Companionship to health facility</b>     |  |                        |  |                        |
| A big problem                               |  | 0.80 (0.69 – 0.93) **  |  | 0.84 (0.72 – 0.98) *   |
| Not a big problem                           |  | 1                      |  | 1                      |
| <b>Participates in healthcare decision.</b> |  |                        |  |                        |
| Participates                                |  | 1.12 (1.00 – 1.25) *   |  | 1.09 (0.98 – 1.22)     |
| Does not participate                        |  | 1                      |  | 1                      |
| <b>Partner's highest level of education</b> |  |                        |  |                        |
| No formal education                         |  | 1                      |  | 1                      |
| Primary education                           |  | 1.32 (1.11 – 1.56)     |  | 1.21 (1.02 – 1.44) *   |
| Secondary education                         |  | 1.56 (1.33 – 1.82)     |  | 1.43 (1.23 – 1.68) *** |

|                                              |                           |                           |                           |                           |
|----------------------------------------------|---------------------------|---------------------------|---------------------------|---------------------------|
| Higher                                       |                           | 2.35 (1.92 – 2.88)        |                           | 2.14 (1.75 – 2.62) ***    |
| <b>Community poverty</b>                     |                           |                           |                           |                           |
| Low                                          |                           |                           | 1                         | 1                         |
| Medium                                       |                           |                           | 0.52 (0.40 – 0.67) ***    | 0.74 (0.59 – 0.93) *      |
| High                                         |                           |                           | 0.33 (0.24 – 0.44) ***    | 0.63 (0.48 – 0.83) **     |
| <b>Community education</b>                   |                           |                           |                           |                           |
| Low                                          |                           |                           | 1                         | 1                         |
| Medium                                       |                           |                           | 3.73 (2.78 – 5.01) ***    | 1.72 (1.32 – 2.24) ***    |
| High                                         |                           |                           | 12.33 (8.38 – 18.14) ***  | 2.65 (1.88 – 3.72) ***    |
| <b>Community distance to health facility</b> |                           |                           |                           |                           |
| Low                                          |                           |                           | 1                         | 1                         |
| Medium                                       |                           |                           | 0.80 (0.69 – 0.97)        | 0.88 (0.73 – 1.05)        |
| High                                         |                           |                           | 0.52 (0.41 – 0.67)        | 0.71 (0.56 – 0.88) **     |
| <b>Place of residence</b>                    |                           |                           |                           |                           |
| Urban                                        |                           |                           | 1                         | 1                         |
| Rural                                        |                           |                           | 0.80 (0.65 – 0.97) *      | 1.03 (0.86 – 1.23)        |
| <b>Region</b>                                |                           |                           |                           |                           |
| Northcentral                                 |                           |                           | 1                         | 1                         |
| Northeast                                    |                           |                           | 0.44 (0.33 – 0.58) ***    | 0.54 (0.42 – 0.71) ***    |
| Northwest                                    |                           |                           | 0.18 (0.13 – 0.24) ***    | 0.25 (0.19 – 0.34) ***    |
| Southeast                                    |                           |                           | 2.81 (2.01 – 3.91) ***    | 1.17 (0.77 – 1.78)        |
| South-south                                  |                           |                           | 0.20 (0.15 – 0.28) ***    | 0.20 (0.14 – 0.27) ***    |
| Southwest                                    |                           |                           | 1.52 (1.13 – 2.04) **     | 1.18 (0.86 – 1.62)        |
|                                              |                           |                           |                           |                           |
| <b>Variance</b>                              | 1.212 (0.751 – 1.957) *** | 0.788 (0.424 – 1.465) *** | 1.191 (0.742 – 1.810) *** | 0.757 (0.401 – 1.431) *** |
| <b>ICC (%)</b>                               | 71.69                     | 39.11                     | 44.93                     | 35.20                     |
| <b>Log Likelihood</b>                        | - 9723.7591               | -8352.1517                | -8998.7979                | -8174.3727                |
| <b>Model fit Statistics</b>                  |                           |                           |                           |                           |

|            |          |          |          |          |
|------------|----------|----------|----------|----------|
| <b>AIC</b> | 19453.52 | 16758.30 | 18027.60 | 16426.75 |
| <b>BIC</b> | 19477.21 | 16971.46 | 18146.03 | 16734.64 |

358  
359  
360  
361  
362  
363  
364  
365  
366  
367  
368  
369  
370  
371  
372  
373  
374  
375  
376  
377  
378  
379  
380  
381  
382  
383  
384

Women from communities with medium level of community poverty (AOR 0.74; 95% CI 0.59 – 0.93). and those from communities with high level off community poverty (AOR 0.63; 95% CI 0.48 – 0.83) had lesser odds of delivering in a health facility, compared to women from communities with low level of community poverty. Compared with women from communities with low level of female education, women from communities with medium level of female education (AOR 1.72; 95% CI 1.32 – 2.24). and those from communities with high level of female education (AOR 2.65; 95% CI 1.88 – 3.72) had higher odds of delivering in a health facility. Women from communities where a high proportion of women considered distance to health facility as a big problem were less likely to use health facility for child delivery (AOR 0.71; 95% CI 0.56 – 0.88). Women from the Northeast, Northwest and South-south regions were less likely to use health facility for child delivery, compared with women from the Northcentral region. (Table 3)

Age at last childbirth, religion, employment status, wanted index pregnancy, participation in healthcare decision and place of residence did not show statistically significant relationship with place of delivery. (Table 3)

**Figure 2:** Percentile map showing the prevalence of health facility delivery among women of reproductive age in Nigeria (NDHS 2018)

## 385 **Discussion**

386 This study assessed the regional trends, determinants, and spatial patterns of health facility  
387 delivery in Nigeria. Our study reveals that only four in ten of women deliver in health facility  
388 in the country. This finding is significant as it demonstrates that poor facility delivery among  
389 women of reproductive age exists in the country and is in keeping with the findings of  
390 Bolarinwa et al., who similarly used the NDHS to assess health facility delivery among women  
391 of reproductive age [7]. In addition, this finding is equally essential because the place of  
392 delivery impacts the quality of maternal and child health services received and may thus  
393 emphasize the need for improving existing strategies and establishment of new programmes to  
394 improve the uptake of facility delivery among reproductive-age women.

395

396 Our study is the first study in Nigeria to assess the trends of health facility delivery across the  
397 six geopolitical zones. Fasina et. al examined the trends of health facility delivery in Nigeria  
398 across two time points – NDHS 2013 and NDHS 2018 for women of reproductive age and  
399 found an increase from 38.02% to 42.04% [17]. Our study showed a similar finding of 36.57%  
400 in 2008, 37.44% in 2013 and 41.14% in 2018. The slight differences in result could be adduced  
401 in differences in the management of variables e.g., handling of variables with missing values.  
402 A study from Kenya showed higher prevalence of health facility delivery compared to our  
403 study, reporting an increase from 68.3% in 2003 to about 95% in 2015 [18]. In Senegal, facility-  
404 based delivery rose from 47% in 1993 to 73% in 2014 and in Namibia, it rose from 67% in  
405 1992 to 87% in 2013 [19]. Despite the positive trend observed in our study, the prevalence of  
406 health facility delivery is much lower than these African countries. Even though the efforts to  
407 improve maternal healthcare utilization is yielding results in Nigeria, there need for more  
408 intensified efforts to improve health facility delivery and ultimately delivery outcomes.

409

410 From our study, all geopolitical zones showed an increase in health facility delivery prevalence  
411 across the years, with exemption of South-south zone where the prevalence of health facility  
412 delivery remained relatively the same in 2013 and 2018. Prevalence of health facility delivery  
413 was least in the northern geopolitical zones and the South-south. These may be due to higher  
414 levels of poverty, illiteracy, and sociocultural beliefs that may contribute to the low utilization  
415 of health facilities for delivery.

416

417 On conducting bivariate analysis, we found that all explanatory variables were significantly  
418 associated with health facility delivery. On further analysis, the study found that as the level of  
419 education increased, the women were more likely to choose health facility delivery. This  
420 finding is consistent with previous studies, including those that analysed the DHS across the  
421 African sub-continent [20-24]. Education has been shown to promote women's independence  
422 in making better health decisions, and highly educated mothers are more likely to seek better  
423 health services. Low maternal education has been a significant barrier to health facility delivery  
424 and seeking skilled attendants during childbirth [20,24]. Programmes to improve health literacy  
425 among women can improve the use of health facilities for delivery while promoting and  
426 ensuring the education of the girl child and women. Another finding of this study is the  
427 significant association between wealth index and health facility delivery. As the household  
428 wealth index of women increased, the likelihood of facility delivery also increased, this result  
429 is in agreement with earlier studies from Nigeria and Ghana [7,22]. One possible explanation  
430 for this finding is that poorer households are prone to financial constraints that may hinder care  
431 seeking at health facilities with skilled attendants at delivery. To reduce disparities in access to  
432 healthcare, it is critical to reduce financial barriers for pregnant women. This can be achieved  
433 through a functional and efficient health insurance scheme and support for poor women to  
434 access health facility during pregnancy.

435 Access to media also had a significant association with health facility delivery, with the  
436 probability of facility delivery increasing with access to media. Pregnant women who have  
437 access to media are more likely to obtain valuable information on the benefits of health facility  
438 delivery. This finding suggests that the media plays a significant role in providing education  
439 and health information, which can considerably influence health-seeking behaviour.

440

441 It was found that the probability of health facility delivery reduced as number of childbirths  
442 increased. The finding agrees with that of a study from East Africa [25]. The significance of  
443 these findings is that women with more children may assume themselves to be more  
444 experienced with childbirth, making them choose to deliver at home rather than seek skilled  
445 delivery. Another possible reason could be that having a large family size means fewer  
446 resources for seeking healthcare, not only for the children within the household but also for the  
447 pregnant mother herself. Additionally, if women had a negative experience with health workers  
448 during a previous health facility delivery, they may choose to avoid having another health  
449 facility delivery. Therefore, it is crucial to provide proper training and supervision for health  
450 workers to ensure they demonstrate the right conduct in their provision of maternal care.

451

452 Our study revealed that women who had at least four ANC visits were more likely to deliver in  
453 the health facility, in keeping with findings from other studies [26,27]. Optimal ANC  
454 attendance provides the opportunity for the women to receive information on available  
455 maternal health care services and the benefits of utilizing them, unlike women with no such  
456 opportunity. Similarly, our study found that women who reported getting support to go to a  
457 health facility was a big problem had a lower probability of delivering in a health facility.  
458 Spousal and family support can improve health-seeking for facility delivery and utilization of  
459 maternal services health facilities.

460 Our study also established that women from communities with medium and high community  
461 poverty had reduced probabilities of delivering in a health facility, unlike those from  
462 communities with low community poverty. Likewise, compared with women from  
463 communities with low levels of female education, women from communities with medium  
464 levels of female education and those from communities with high levels of female education  
465 had higher possibilities of delivering in a health facility. This finding is in consistent with that  
466 of a previous study [20]. This finding reveals the need for programmes and interventions that  
467 can reduce community poverty and improve communities' socioeconomic status and education  
468 level. The study found that women from communities who reported distance to health facilities  
469 as a big problem had lower prospects of health facility delivery in keeping with findings of  
470 previous studies [7,20]. A possible explanation for this finding is that when health facilities  
471 are not easily accessible, ready alternatives are likely to be preferred to avoid the anticipated  
472 difficulties associated with seeking maternal health services from health facilities.

473

474 Further still, it was observed in this study that women from the Northeast, Northwest and  
475 South-south regions were less likely to utilize health facilities for delivery when compared to  
476 women from the Northcentral region of the country. This can also be observed from the spatial  
477 analysis in which unlike the north, the southwestern and southeastern states had high and very  
478 high utilization of health facility for delivery, and this was seen to decrease moving towards  
479 the northern part of the country. These findings agree with that of a previous study [12] and  
480 could possibly be due to contextual disparities. **These regions have varying levels of poverty,**  
481 **illiteracy, and sociocultural beliefs that may contribute to the findings [28].**

482

483 In **addressing the findings from this study,** the government, at all levels, must focus on  
484 individual and community-level issues that contribute to the low uptake of health facility

485 delivery among women through a combination of approaches with particular attention to  
486 context-specific solutions that address the factors contributing to these findings.

487

## 488 **Strengths and Limitations**

489 This study is the first to examine the trends of health facility delivery across geopolitical zones  
490 in Nigeria and is also the first study to conduct a spatial analysis of health facility delivery in  
491 the country. However, there are still some limitations to be acknowledged. Firstly, the data was  
492 self-reported and collected retrospectively, thus study is susceptible to recall bias. Secondly,  
493 the study dataset was cross-sectional in nature, it was only possible to establish an association  
494 and not causality. Thirdly, due to multicollinearity, we couldn't determine the effect of marital  
495 status on health facility delivery.

496

## 497 **Conclusion**

498 The current study revealed the low prevalence of health facility delivery among women of  
499 reproductive age in Nigeria. It further showed the influence of factors such as achieving higher  
500 levels of education, having fewer children, having optimal ANC attendance, and many other  
501 factors have on health facility delivery. There is a need to deploy appropriate strategies and  
502 programme to improve health facility delivery.

503

504

505

506

507

508

509

510



## References

- 511
- 512 1. Gebreegziabher SB, Marrye SS, Kumssa TH, Merga KH, Feleke AK, Dare DJ et al.  
513 Assessment of maternal and child health care services performance in the context of  
514 COVID-19 pandemic in Addis Ababa, Ethiopia: evidence from routine service data.  
515 *Reprod Health*. 2022 Feb 14;19(1):42. doi: 10.1186/s12978-022-01353-6.
- 516 2. Ossai EN, Eze II, Eke PC, Onah CK, Agu C, Ogbonnaya LU. Where, why and who  
517 delivers our babies? Examining the perspectives of women on utilization of antenatal  
518 and delivery services in a developing country. *BMC Pregnancy Childbirth*. 2023 Jan  
519 2;23(1):1. doi: 10.1186/s12884-022-05306-6.
- 520 3. Zhang X, Anser MK, Ahuru RR, Zhang Z, Peng MY, Osabohien R, Mirza M. Do  
521 Predictors of Health Facility Delivery Among Reproductive-Age Women Differ by  
522 Health Insurance Enrollment? A Multi-Level Analysis of Nigeria's Data. *Front Public*  
523 *Health*. 2022 Apr 14;10:797272. doi: 10.3389/fpubh.2022.797272.
- 524 4. Eluobaju D, Okonofua F, Weine S, Goba G. Understanding birthing preferences of  
525 women in Benin City, Nigeria: a qualitative study. *BMJ Open*. 2023 May  
526 2;13(5):e054603. doi: 10.1136/bmjopen-2021-054603
- 527 5. UNICEF. Delivery care. Available from: [https://data.unicef.org/topic/maternal-](https://data.unicef.org/topic/maternal-health/delivery-care/)  
528 [health/delivery-care/](https://data.unicef.org/topic/maternal-health/delivery-care/) (Accessed 13/08/2023)
- 529 6. Michael T. O, Nwokocha E. E. and Ukwandu D. Child Delivery Care Practices among  
530 Unmarried Younger Adolescents in Nigeria: The Case of Akwa Ibom State. *NJESS*.  
531 2021; 63(3):403-432.
- 532 7. Bolarinwa OA, Fortune E, Aboagye RG, Seidu AA, Olagunju OS, Nwagbara UI,  
533 Ameyaw EK, Ahinkorah BO. Health facility delivery among women of reproductive  
534 age in Nigeria: Does age at first birth matter? *PLoS One*. 2021 Nov 4;16(11):e0259250.  
535 doi: 10.1371/journal.pone.0259250.

- 536 8. National Population Commission (NPC) [Nigeria] and ICF. 2019. 2018 Nigeria DHS  
537 Key Findings. Abuja, Nigeria and Rockville, Maryland, USA: NPC and ICF.
- 538 9. UN Department of Economic and Social Affairs Sustainable Development, United  
539 Nations. The 17 Goals Available from: <https://sdgs.un.org/goals> (Accessed 13/08/2023)
- 540 10. Maternal Health Task Force. Five ways an innovative program increased facility birth in  
541 Nigeria. Available from: [https://www.mhtf.org/2015/01/13/five-ways-an-innovative-](https://www.mhtf.org/2015/01/13/five-ways-an-innovative-program-increased-facility-birth-in-nigeria/)  
542 [program-increased-facility-birth-in-nigeria/](https://www.mhtf.org/2015/01/13/five-ways-an-innovative-program-increased-facility-birth-in-nigeria/) (Accessed 13/08/2023)
- 543 11. UCSF. Strategies to increase health facility deliveries: Three case studies. 2014;  
544 Available from: [https://globalhealthsciences.ucsf.edu/global-health-group/%0Aghg-](https://globalhealthsciences.ucsf.edu/global-health-group/%0Aghg-publications)  
545 [publications](https://globalhealthsciences.ucsf.edu/global-health-group/%0Aghg-publications) (Accessed 13/08/2023)
- 546 12. Ononokpono DN, Odimegwu CO. Determinants of Maternal Health Care Utilization in  
547 Nigeria: a multilevel approach. Pan Afr Med J. 2014 Jan 18;17 Suppl 1(Suppl 1):2. doi:  
548 10.11694/pamj.supp.2014.17.1.3596.
- 549 13. Adedokun ST, Uthman OA. Women who have not utilized health Service for Delivery in  
550 Nigeria: Who are they and where do they live? BMC Pregnancy Childbirth.  
551 2019;19(1):1–14.
- 552 14. Dahiru T, Oche OM. Determinants of antenatal care, institutional delivery and postnatal  
553 care services utilization in Nigeria. Pan Afr Med J. 2015;21:1–17.
- 554 15. Lukman Solanke B, Adebayo Rahman S, Olasupo Ogunjuyigbe P. To what extent do  
555 community characteristics drive health facility delivery? Findings among Women who  
556 had recent live births in Nigeria. Heal Soc Care Community. 2021;29(4):992–1000.
- 557 16. USAID. The DHS Program - Demographic and Health Survey (DHS). Available from:  
558 <https://dhsprogram.com/Methodology/Survey-Types/DHS.cfm> (Accessed 20/08/2023)

- 559 17. Fasina F, Oni G, Oduaran A, Samuel G. Trends in maternal health facilities utilization  
560 and women's autonomy in Nigeria (2013-2018): Attainment of sustainable development  
561 goals-5, *Cogent Arts & Humanities*. 2020; 7:1, doi: [10.1080/23311983.2020.1823598](https://doi.org/10.1080/23311983.2020.1823598)
- 562 18. Atahigwa C, Kadengye DT, Iddi S, Abrams S, Rie AV. Trends and determinants of  
563 health facility childbirth service utilization among mothers in urban slums of Nairobi,  
564 Kenya. *Global Epidemiology*.2020;2:100029
- 565 19. Udo IE, Doctor HV. Trends in Health Facility Births in sub-Saharan Africa: An Analysis  
566 of Lessons Learned under the Millennium Development Goal Framework. *Afr J Reprod*  
567 *Health*. 2016 Sep;20(3):108-117.
- 568 20. Olubodun T, Rahman SA, Odukoya OO, Okafor IP, Balogun MR. Determinants of  
569 health facility delivery among young mothers aged 15 - 24 years in Nigeria: a multilevel  
570 analysis of the 2018 Nigeria demographic and health survey. *BMC Pregnancy*  
571 *Childbirth*. 2023 Mar 17;23(1):185. doi: 10.1186/s12884-023-05492-x.
- 572 21. Olusanya BO, Alakija OP, Inem VA. Non-uptake of facility-based maternity services in  
573 an inner-city community in Lagos, Nigeria: an observational study. *J Biosoc Sci*. 2010;  
574 42:341-358 doi:10.1017/ S0021932009990526
- 575 22. Dankwah E, Zeng W, Feng C, Kirychuk S, Farag M. The social determinants of health  
576 facility delivery in Ghana. *BMC Reprod Heal*. 2019;16:1–10.
- 577 23. Zegeye B, Ahinkorah BO, Idriss-wheelr D, Oladimeji O, Olorunsaiye CZ, Yaya S.  
578 Predictors of institutional delivery service utilization among women of reproductive age  
579 in Senegal : a population-based study. *Public Health*. 2021;79:5.
- 580 24. Dimbuene ZT, Amo-Adjei J, Amugsi D, Mumah J, Izugbara CO, Beguy D. Women's  
581 education and utilization of maternal health services in Africa: A multi-country and  
582 socioeconomic status analysis. *J Biosoc Sci*. 2018;50(6):800–22.
- 583 25. Agaba P, Magadi M, Orton B. Predictors of health facility childbirth among unmarried

- 584 and married youth in Uganda. PLoS ONE. 2022;17(4):e0266657.
- 585 26. Nahar MT, Anik SMF, Islam MA, Islam SMS. Individual and communitylevel factors  
586 associated with skilled birth attendants during delivery in Bangladesh: A multilevel  
587 analysis of demographic and health surveys. PLoS ONE. 2022;17(6):e0267660.
- 588 27. Solanke BL, Rahman SA. Multilevel analysis of factors associated with assistance  
589 during delivery in rural Nigeria: Implications for reducing rural-urban inequity in skilled  
590 care at delivery. BMC Pregnancy Childbirth. 2018;18(1):1–15.
- 591 28. Jaiyeola AO, Choga I. Assessment of poverty incidence in Northern Nigeria. J Poverty.  
592 2021;25(2):155–72.
- 593

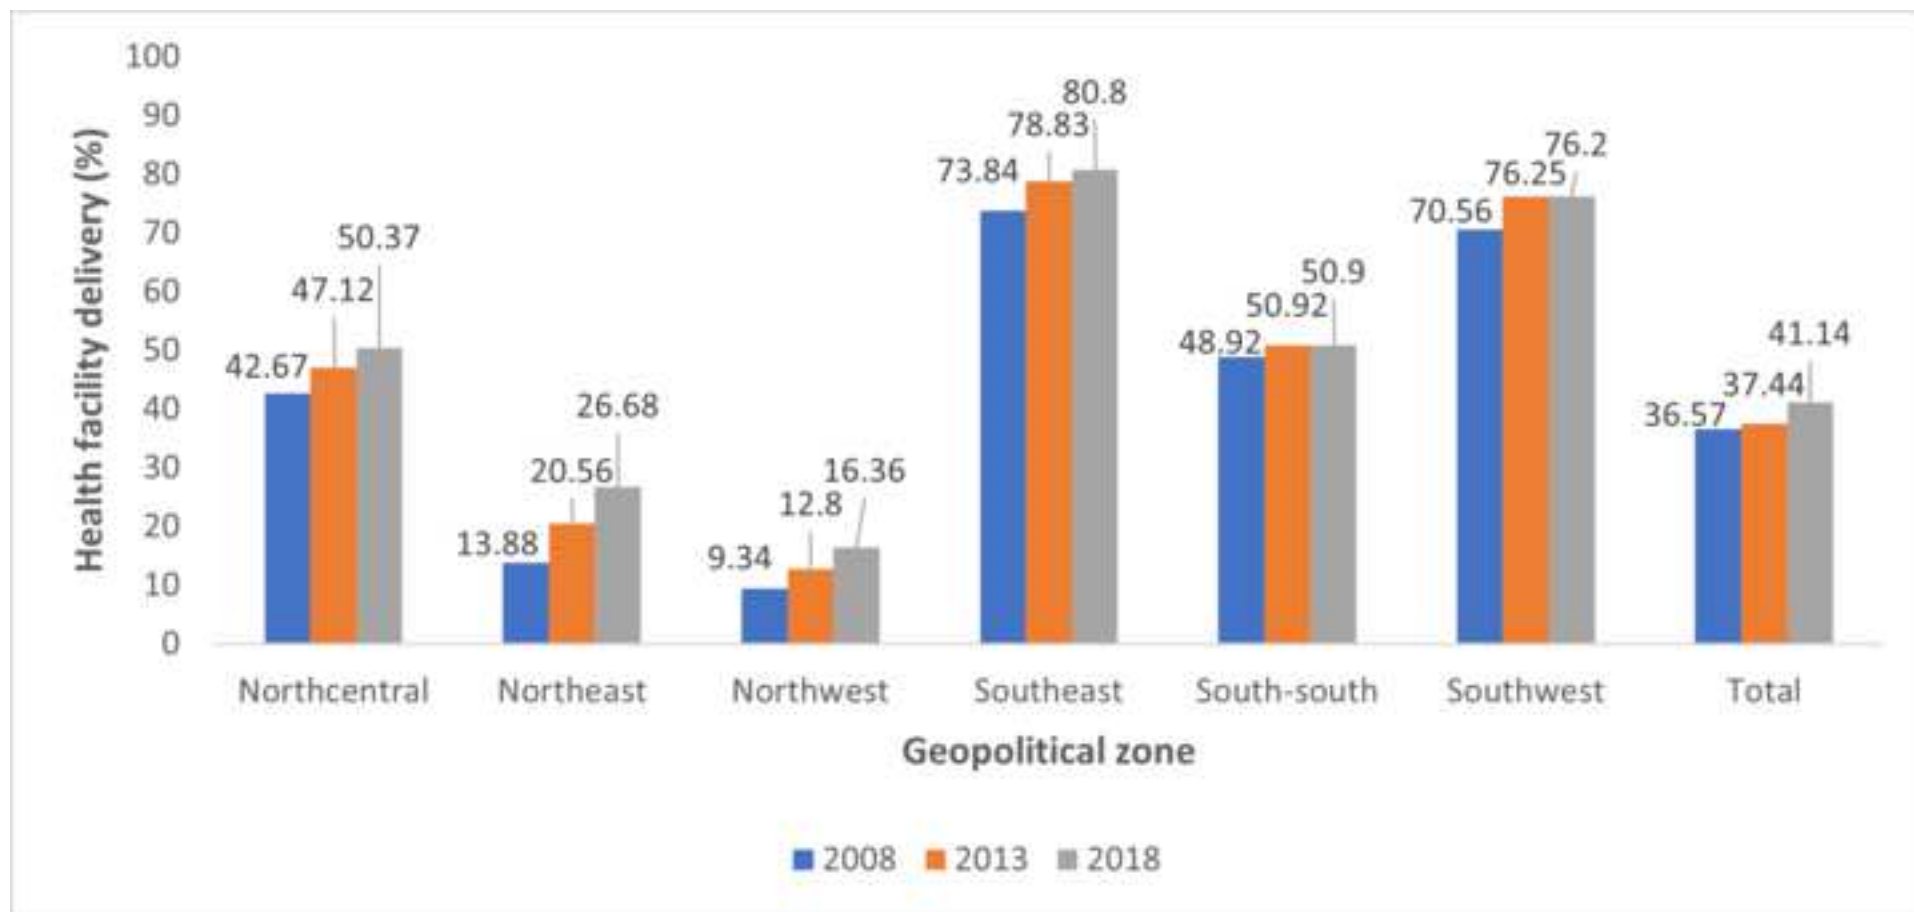

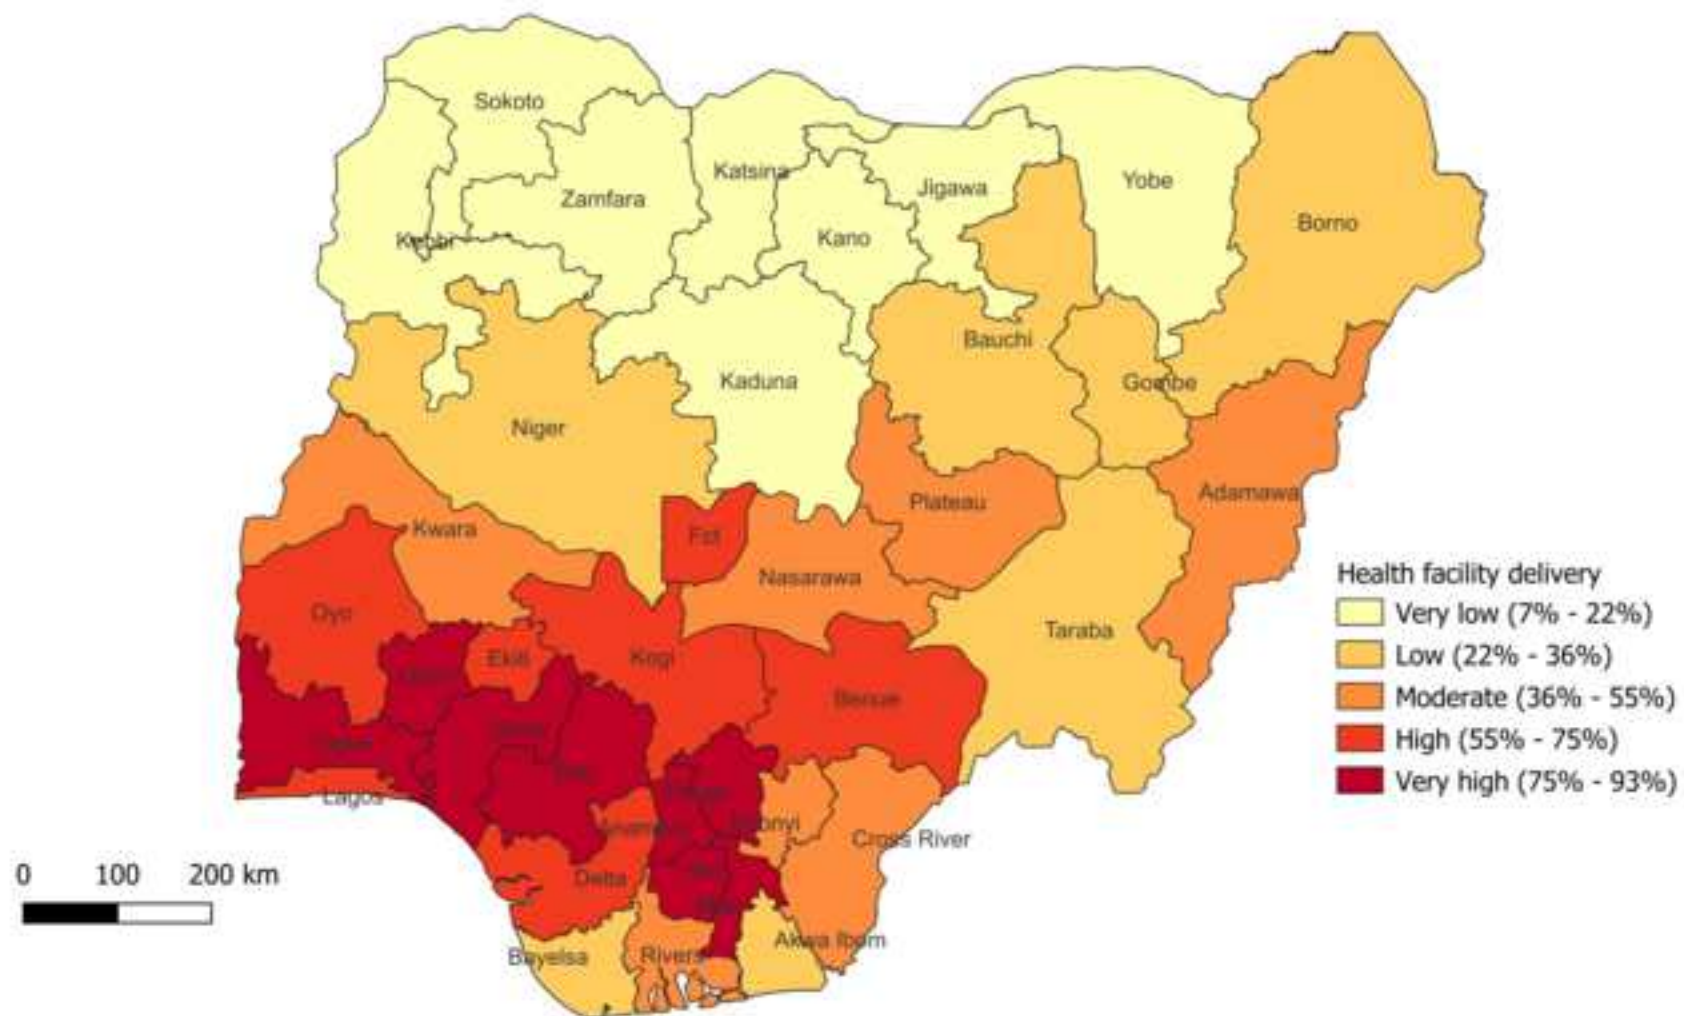

Supplement: pone.0312005.s002.pdf [file pone.0312005.s002.pdf]
