# Supplementary material for: Regional trends, spatial patterns and determinants of health facility delivery among women of reproductive age in Nigeria: A national population based cross-sectional study
Source: PubMed Central journal article supplement (PMC11482673; doi:10.1371/journal.pone.0312005), 2024-10-16
Supplement: pone.0312005.s001.pdf [file pone.0312005.s001.pdf]

```

clear all
set more off
set maxvar 15000
set memory 15000
use "C:\Users\USER\Desktop\Articles\Tope Olubodun\Manuscript2\NGIR7AFL.dta"

*****WEIGHTING*****
gen wgt = v005/1000000

svyset[pw=wgt],psu(v001) strata(v022) singleunit(center)

*****SAMPLE SIZE*****
drop if v201 == 0

***** RECODE MARITAL STATUS*****
tab v502,m

recode v502 (0 2 = 1 "unmarried")(1 = 2 "married"), gen (mstatus)

tab mstatus,m

***** HF DELIVERY *****
tab m15_1,m

drop if m15_1 == .

drop if m15_1 == 99

tab m15_1,m

recode m15_1 (11 12 96 = 0 " no hf delivery")(21 22 23 26 31 36 = 1 " hf delivery"), gen (hfdelivery)

tab hfdelivery,m

*****
*****
***** INDEPENDENT VARIABLES*****

*****RECODE AGE AT LAST CHILDBIRTH*****

gen agebirth =(b3_01 - v011)/12

tab agebirth,m

recode agebirth (11/19.9999 = 1 "15-19") (20/29.9999 = 2 "20-29") (30/39.9999 = 3 "30-39")
(40/49.9999 = 4 "40-49"), gen (cat_agebirth)

```

```
tab cat_agebirth,m
```

```
*****RECODE RELIGION*****
```

```
tab v130,m
```

```
recode v130 (1/2 = 1 "christianity")(3 = 2 "Islam")(4 96 99 . = 3 "traditional/others"), gen (religion)
```

```
tab religion,m
```

```
*****RECODE ETHNICITY *****
```

```
gen ethnless98 = v131 if v131 < 98
```

```
recode ethnless98 (1 4 5 7 9 96 = 4 "others")(2 3 8 = 1 "haua/fulani/kanuri")(10 = 2 "yoruba")(6 = 3 "igbo"), gen (ethnicity)
```

```
*****EDUCATION*****
```

```
rename v106 educ
```

```
tab educ, m
```

```
*****EMPLOYMENT*****
```

```
tab v714,m
```

```
recode v714 (0 9 . = 0 "unemployed") (1 = 1 "employed"), gen (employ)
```

```
tab employ,m
```

```
***** WEALTH INDEX*****
```

```
xtile wealthindex = v191, nq(3)
```

```
la def wealthindex 1 poor 2 middle 3 rich
```

```
la val wealthindex wealthindex
```

```
tab wealthindex, m
```

```
*****RECODE MASS MEDIA EXPOSURE*****
```

```
**** v157 newspaper****
```

```
tab v157,m
```

```
tab v157,m
```

recode v157 (0/1 = 0 "poor read") (2/3 = 1 "good read"), gen (newspaper)

tab newspaper,m

\*\*\*\*\* v158 radio\*\*\*\*\*

tab v158,m

recode v158 (0/1 = 0 "poor listen") (2/3 = 1 "good listen"), gen (radio)

tab radio,m

\*\*\*\*\* v159 television\*\*\*\*\*

tab v159,m

recode v159 (0/1 = 0 "poor watch") (2/3 = 1 "good watches"), gen (television)

tab television,m

\*\*\*\*\* massmedia\*\*\*\*\*

gen massmedia = newspaper + radio + television

tab massmedia,m

recode massmedia (0 = 0 "no/poor mass media") (1/3 = 1 "frequent mass media"), gen (cat\_massmedia)

tab cat\_massmedia, m

\*\*\*\*\*RECODE WANTED PREGNANCY\*\*\*\*\*

tab m10\_1,m

recode m10\_1 (1 = 1 "yes")(2 3 9 . = 2 "no"), gen (wantedpreg)

tab wantedpreg,m

\*\*\*\*\*RECODE NUMBER OF CHILDBIRTHS\*\*\*\*\*

tab v201,m

recode v201 (1/2 = 1 "1-2")(3/4 = 2 "3-4")(5/20 = 3 "5-17"), gen (no\_child)

tab no\_child,m

\*\*\*\*\*DISTANCE TO HF\*\*\*\*\*

tab v467d,m

rename v467d distancetohf

tab distancetohf,m

\*\*\*\*\*COMPANION\*\*\*\*\*

tab v467f, m

rename v467f companion

tab companion,m

\*\*\*\*\*RECODE DECIDES ON HEALTHCARE\*\*\*\*\*

tab v743a,m

recode v743a (1 2 = 1 "participates")(4 5 6 . = 2 "does not participate"), gen (decideshc)

tab decideshc,m

\*\*\*\*\*RECODE HUSBANDS EDUCATION \*\*\*\*\*

gen husbeduc = v701 if v701 < 8

tab husbeduc,m

\*\*\*\*\* PLACE OF RESIDENCE\*\*\*\*\*

rename v025 place\_res

tab place\_res, m

\*\*\*\*\* REGION\*\*\*\*\*

rename v024 region

\*\*\*\*\*ANC VISITS\*\*\*\*\*

tab m14\_1,m

gen anc = m14\_1 if m14\_1 < 98

tab anc,m

recode anc (0/3 = 0 "less than 4")(4/20 = 1 "at least 4"), gen (no\_anc)

tab no\_anc, m

\*\*\*\*\*COMMUNITY POVERTY\*\*\*\*\*

gen commpov = 0

replace commpov = 1 if v190 == 1

bysort v001:egen commpov2 = mean (commpov)

xtile commpov3 = commpov2, nq(3)

\*\*\*\*\*COMMUNITY EDUCATION\*\*\*\*\*

recode educ (0/1 = 1 "no educ/primary")(2/3 = 2 "secon/higher"), gen (educ2grps)

gen comeduc = 0

replace comeduc = 1 if educ2grps ==2

bysort v001:egen comeduc2 = mean (comeduc)

xtile comeduc3 = comeduc2, nq(3)

\*\*\*\*\*COMMUNITY DISTANCE TO HF\*\*\*\*\*

gen commdist = 0

replace commdist = 1 if distancetohf == 1

bysort v001:egen commdist2 = mean (commdist)

xtile commdist3 = commdist2, nq(3)

\*\*\*\*\*  
\*\*\*\*\*  
\*\*\*\*\*  
\*\*\*\*\*FREQUENCY TABLES\*\*\*\*\*

svy: tab hfdelivery, per obs

svy: tab cat\_agebirth, per obs

svy: tab mstatus, per obs

svy: tab religion, per obs

svy: tab ethnicity, per obs

svy: tab educ, per obs

svy: tab employ,per obs

svy: tab wealthindex, per obs  
svy: tab cat\_massmedia, per obs  
svy: tab wantedpreg, per obs  
svy: tab no\_child, per obs  
svy: tab no\_anc, per obs  
svy: tab companion, per obs  
svy: tab decideshc, per obs  
svy: tab husbeduc, per obs  
svy: tab place\_res, per obs  
svy: tab region, per obs  
svy: tab commpov3, per obs  
svy: tab commeduc3, per obs  
svy: tab commdist3, per obs

\*\*\*\*\*##\*\*\*\*\*BIVARIATE ANALYSIS\*\*\*\*\*  
\*\*\*\*\*  
\*\*\*\*\*  
\*\*\*\*\*

svy: tab cat\_agebirth hfdelivery, percent row obs  
svy: tab mstatus hfdelivery, percent row obs  
svy: tab religion hfdelivery, percent row obs  
svy: tab ethnicity hfdelivery, percent row obs  
svy: tab educ hfdelivery, percent row obs  
svy: tab employ hfdelivery, percent row obs  
svy: tab wealthindex hfdelivery, percent row obs  
svy: tab cat\_massmedia hfdelivery, percent row obs  
svy: tab wantedpreg hfdelivery, percent row obs  
svy: tab no\_child hfdelivery, percent row obs  
svy: tab no\_anc hfdelivery, percent row obs  
svy: tab companion hfdelivery, percent row obs  
svy: tab husbeduc hfdelivery, percent row obs  
svy: tab decideshc hfdelivery, percent row obs  
svy: tab place\_res hfdelivery, percent row obs  
svy: tab region hfdelivery, percent row obs

```
svy: tab commpov3 hfdelivery, percent row obs
svy: tab commeduc3 hfdelivery, percent row obs
svy: tab commdist3 hfdelivery, percent row obs
```

\*\*\*Crude odd ratios

```
svy: logistic hfdelivery i.cat_agebirth
svy: logistic hfdelivery i.mstatus
svy: logistic hfdelivery i.religion
svy: logistic hfdelivery i.ethnicity
svy: logistic hfdelivery i.educ
svy: logistic hfdelivery i.employ
svy: logistic hfdelivery i.wealthindex
svy: logistic hfdelivery i.cat_massmedia
svy: logistic hfdelivery i.wantedpreg
svy: logistic hfdelivery i.no_child
svy: logistic hfdelivery i.no_anc
svy: logistic hfdelivery i.companion
svy: logistic hfdelivery i.husbeduc
svy: logistic hfdelivery i.decideshc
svy: logistic hfdelivery i.place_res
svy: logistic hfdelivery i.region
svy: logistic hfdelivery i.commpov3
svy: logistic hfdelivery i.commeduc3
svy: logistic hfdelivery i.commdist3
```

\*\*\*\*\* VIF \*\*\*\*\*

```
logistic hfdelivery i.cat_agebirth i.mstatus i.religion i.ethnicity i.educ i.employ i.wealthindex
i.cat_massmedia ib2.wantedpreg i.no_child i.no_anc ib2.companion ib2.decideshc i.husbeduc
i.place_res i.region i.commpov3 i.commeduc3 i.commdist3
```

vif, uncentered

\*\*\*\*\* EMPTY MODEL REGRESSION\*\*\*\*\*

```
xtmelogit hfdelivery || v001: || v002:, or variance
```

estat ic

estat icc

\*\*\*\*\* INDIVIDUAL LOGISTIC REGRESSION

\*\*\*\*\*

```
xtmelogit hfdelivery i.cat_agebirth i.religion i.ethnicity i.educ i.employ i.wealthindex
i.cat_massmedia ib2.wantedpreg i.no_child i.no_anc ib2.companion ib2.decideshc
i.husbeduc|| v001: || v002:, or variance
```

estat ic

estat icc

\*\*\*\*\* COMMUNITY LOGISTIC REGRESSION

\*\*\*\*\*

xtnlogit hfdelivery i.place\_res i.region i.commpov3 i.commeduc3 i.commdist3 || v001: || v002:,  
or variance

estat ic

estat icc
